# Supplementary material for: Large Spin Coherence Length and High Photovoltaic Efficiency of the Room Temperature Ferrimagnet Ca2FeOsO6 by Strain Engineering
Source: PubMed Central journal article supplement (PMC9475547; doi:10.1002/advs.202106037), 2022-07-21
Supplement: ADVS-9-2106037-s001.pdf [file ADVS-9-2106037-s001.pdf]

## Supporting Information

for *Adv. Sci.*, DOI 10.1002/adv.202106037

Large Spin Coherence Length and High Photovoltaic Efficiency of the Room Temperature Ferrimagnet  $\text{Ca}_2\text{FeOsO}_6$  by Strain Engineering

*Paresh C. Rout and Udo Schwingenschlögl\**

## Supplementary Material

### Large spin coherence length and high photovoltaic efficiency of the epitaxial strained room temperature ferrimagnetic $\text{Ca}_2\text{FeOsO}_6$

Paresh C. Rout and Udo Schwingenschlög

*Physical sciences and Engineering Division (PSE),*

*King Abdullah University of Science and Technology (KAUST), Thuwal 23955-6900, Saudi Arabia*

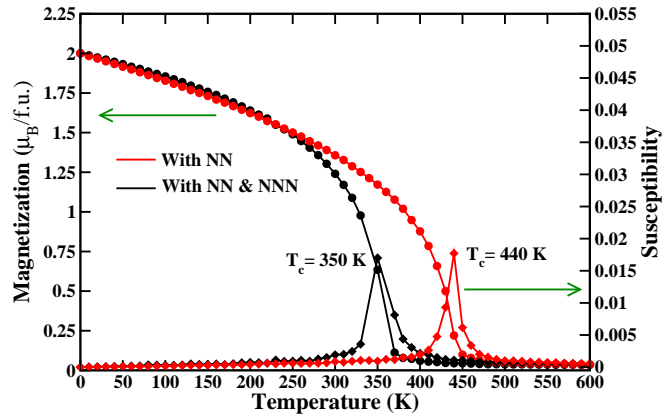

FIG. S1. Temperature dependences of the magnetic susceptibility and total magnetization without strain obtained from classical Monte Carlo simulations, indicating that the critical temperature of the G-FiM phase is 440 K when only the NN couplings are considered and 350 K when both the NN and NNN couplings are considered. The total magnetization rapidly decreases near the critical temperature, indicating a FM-to-paramagnetic phase transition.

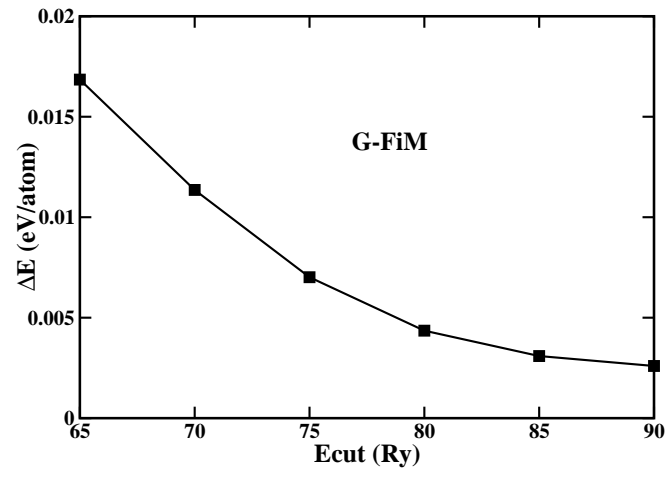

FIG. S2. Total energy convergence with respect to the plane wave cutoff energy.
